# Supplementary material
Source: PubMed Central journal article supplement (PMC3347235)
Supplement: supp_32.9.1604_MCB-MCB06547-11-s01.pdf [file supp_32.9.1604_MCB-MCB06547-11-s01.pdf]

TABLE S1. *Saccharomyces cerevisiae* strains used in this study.

| Strain      | Relevant genotype                                                                                              | Reference/<br>Source |
|-------------|----------------------------------------------------------------------------------------------------------------|----------------------|
| UCC5913     | <i>MATa-inc ade2-101 lys2-801 his3-Δ200 trp1-Δ63 ura3-52 leu2-Δ1::GAL1-HO-LEU2 VII-L::ADE2-TG(1-3)-HO-LYS2</i> | 3                    |
| YLL2599     | UCC5913 <i>bar1Δ::HPHMX</i>                                                                                    | 1                    |
| YLL2650     | UCC5913 <i>rif2Δ::NATMX bar1Δ::HPHMX</i>                                                                       | 1                    |
| YLL2670     | UCC5913 <i>MRE11-MYC::TRP1 bar1Δ::HPHMX</i>                                                                    | This study           |
| YLL2820     | UCC5913 <i>tel1Δ::HIS3 bar1Δ::HPHMX</i>                                                                        | This study           |
| YLL2831     | UCC5913 <i>mre11Δ::KANMX4 bar1Δ::HPHMX</i>                                                                     | This study           |
| YLL2836     | UCC5913 <i>TEL1-hy909::KANMX4 bar1Δ::HPHMX</i>                                                                 | This study           |
| YLL2860     | UCC5913 <i>exo1Δ::URA3 TEL1-hy909::KANMX4 bar1Δ::HPHMX</i>                                                     | This study           |
| YLL2861     | UCC5913 <i>MRE11-MYC::HIS3 TEL1-hy909::KANMX4 bar1Δ::HPHMX</i>                                                 | This study           |
| YLL2874     | UCC5913 <i>rif2Δ::TRP1 TEL1-hy909::KANMX4 bar1Δ::HPHMX</i>                                                     | This study           |
| YLL2876     | UCC5913 <i>mre11Δ::NATMX TEL1-hy909::KANMX4 bar1Δ::HPHMX</i>                                                   | This study           |
| YLL3003     | UCC5913 <i>NATMX::TEL1-hy909-HA::KANMX4 bar1Δ::HPHMX</i>                                                       | This study           |
| YLL3060     | UCC5913 <i>EST1-MYC::HIS3 bar1Δ::HPHMX</i>                                                                     | This study           |
| YLL3061     | UCC5913 <i>EST1-MYC::HIS3 TEL1-hy909::KANMX4 bar1Δ::HPHMX</i>                                                  | This study           |
| YLL3068     | UCC5913 <i>TEL1-HA::NATMX bar1Δ::HPHMX</i>                                                                     | This study           |
| YLL3130     | UCC5913 <i>TEL1-hy909kd::KANMX4 bar1Δ::HPHMX</i>                                                               | This study           |
| RMY169      | <i>MATa-inc ade2-101 lys2-801 his3-Δ200 trp1-Δ63 ura3-52 leu2-Δ1::GAL1-HO-LEU2 VII-L::TRP1-HO-LYS2</i>         | 3                    |
| YLL3053     | RMY169 <i>bar1Δ::HPHMX</i>                                                                                     | This study           |
| YLL3066     | RMY169 <i>TEL1-hy909::KANMX4 bar1Δ::HPHMX</i>                                                                  | This study           |
| DMP2156/15B | W303 ( <i>MATa ade2-1 can1-100 his3-11,15 leu2-3,112 trp1-1 ura3-1 rad5-535</i> )<br><i>tel1Δ::HIS3</i>        | This study           |
| DMP4627/3B  | W303 <i>TEL1-hy909::LEU2 rif2Δ::KANMX4</i>                                                                     | This study           |
| DMP4621/1A  | W303 <i>TEL1-hy909::LEU2 rif1Δ::KANMX4</i>                                                                     | This study           |
| DMP4970/9D  | W303 <i>xrs2-11::KANMX4</i>                                                                                    | This study           |
| DMP4975/30B | W303 <i>xrs2-11::KANMX4 TEL1-hy909::LEU2</i>                                                                   | This study           |
| DMP5200/2B  | W303 <i>TEL1-hy909::KANMX4 rad51Δ::HIS3</i>                                                                    | This study           |
| DMP5200/2D  | W303 <i>rad51Δ::HIS3</i>                                                                                       | This study           |
| DMP5201/3A  | W303 <i>TEL1-hy909::KANMX4 rad52Δ::TRP1</i>                                                                    | This study           |
| DMP5201/3D  | W303 <i>rad52Δ::TRP1</i>                                                                                       | This study           |
| YLL1221     | W303 <i>rif1Δ::KANMX4</i>                                                                                      | This study           |
| YLL1334     | W303 <i>rif2Δ::KANMX4</i>                                                                                      | This study           |
| YLL1996     | W303 <i>TEL1/TEL1-hy909::LEU2 EST2/est2Δ::KANMX</i>                                                            | This study           |
| YLL2283     | W303 <i>TEL1-hy909::KANMX4</i>                                                                                 | This study           |
| YLL3001     | W303 <i>TEL1-HA::NATMX</i>                                                                                     | This study           |
| YLL3059     | W303 <i>TEL1-hy909kd::KANMX4</i>                                                                               | This study           |
| JKM139      | <i>MATa ho hmlΔ hmrΔ ade1 lys5 leu2-3,112 trp1::hisG ura3-52 ade3::GAL-HO</i>                                  | 2                    |
| YLL1643     | JKM139 <i>bar1Δ::HPHMX</i>                                                                                     | This study           |
| YLL2880     | JKM139 <i>TEL1-hy909::LEU2 bar1Δ::HPHMX</i>                                                                    | This study           |

|         |                                                                                             |            |
|---------|---------------------------------------------------------------------------------------------|------------|
| YLL2892 | JKM139 <i>yku70Δ::URA3 bar1Δ::HPHMX</i>                                                     | This study |
| YSN645  | <i>EST1-Myc13::HIS3, VII-L::ADE2-Dbp(amp7)-TG-250-HO site, V-R::TRP1-Dbp(amp9)-TG-80-HO</i> | 4          |
| YLL2253 | YSN645 <i>leu2Δ::KANMX4</i>                                                                 | This study |
| YLL2255 | YSN645 <i>TEL1-hy909::LEU2 leu2Δ::KANMX4</i>                                                | This study |
| YLL2322 | YSN645 <i>rif1Δ::NATMX leu2Δ::KANMX4</i>                                                    | This study |
| YLL2323 | YSN645 <i>rif2Δ::HPHMX leu2Δ::KANMX4</i>                                                    | This study |
| YLL2324 | YSN645 <i>TEL1-hy909::LEU2 rif1Δ::HPHMX leu2Δ::KANMX4</i>                                   | This study |
| YLL2325 | YSN645 <i>TEL1-hy909::LEU2 rif2Δ::HPHMX leu2Δ::KANMX4</i>                                   | This study |

## References

- Bonetti, D., M. Clerici, S. Anbalagan, M. Martina, G. Lucchini, and M. P. Longhese.** 2010. Shelterin-like proteins and Yku inhibit nucleolytic processing of *Saccharomyces cerevisiae* telomeres. *PLoS Genet.* **6**: e1000966.
- Lee, S. E., J. K. Moore, A. Holmes, K. Umezu, R. D. Kolodner, and J. E. Haber.** 1998. *Saccharomyces* Ku70, Mre11/Rad50 and RPA proteins regulate adaptation to G2/M arrest after DNA damage. *Cell* **94**: 399-409.
- Michelson, R. J., S. Rosenstein, and T. Weinert.** 2005. A telomeric repeat sequence adjacent to a DNA double-stranded break produces an antieckpoint. *Genes & Dev.* **19**: 2546-2559.
- Negrini, S., V. Ribaud, A. Bianchi, and D. Shore.** 2007. DNA breaks are masked by multiple Rap1 binding in yeast: implications for telomere capping and telomerase regulation. *Genes & Dev.* **21**: 292-302.
